# Supplementary material
Source: PubMed Central journal article supplement (PMC2789117)

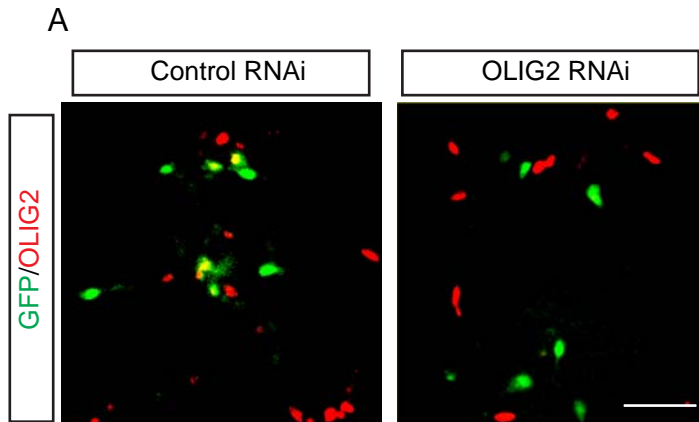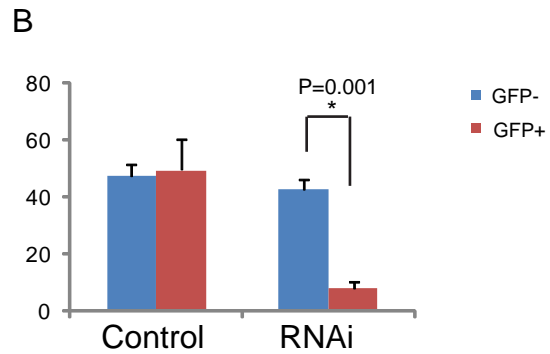

Supplement: NIHMS110781-supplement-Fig_S1.pdf [file NIHMS110781-supplement-Fig_S1.pdf]

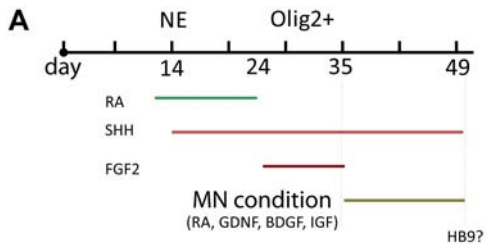

**B**

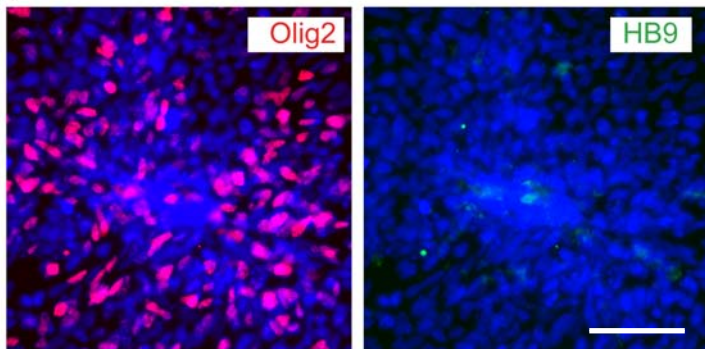

Supplement: NIHMS110781-supplement-Fig_S3.pdf [file NIHMS110781-supplement-Fig_S3.pdf]

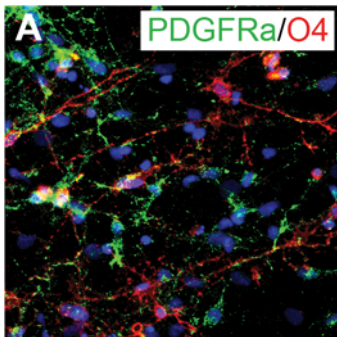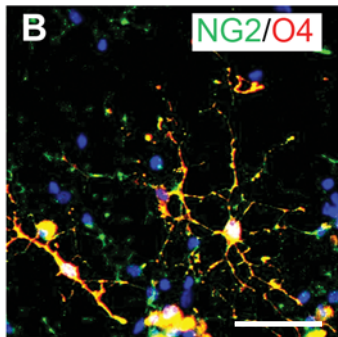

Supplement: NIHMS110781-supplement-Fig_S4.pdf [file NIHMS110781-supplement-Fig_S4.pdf]
